## CORRECTION

# Correction: Effects of impregnation combined heat treatment on the pyrolysis behavior of poplar wood

The *PLOS ONE* Staff

The third author's name is spelled incorrectly. The correct name is: Chenyang Cai.

An additional affiliation is missing for the sixth author. Jiabin Cai is also affiliated with Co-innovation Center of Efficient Processing and Utilization of Forest Resources, Nanjing, Jiangsu, China.

The publisher apologizes for the errors.

## Reference

1. Wu M, Jin J, Cai C, Shi J, Xing X, Cai J (2020) Effects of impregnation combined heat treatment on the pyrolysis behavior of poplar wood. *PLoS ONE* 15(3): e0229907. <https://doi.org/10.1371/journal.pone.0229907> PMID: 32182254

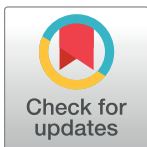

## OPEN ACCESS

**Citation:** The *PLOS ONE* Staff (2020)

Correction: Effects of impregnation combined heat treatment on the pyrolysis behavior of poplar wood. *PLoS ONE* 15(7): e0236899. <https://doi.org/10.1371/journal.pone.0236899>

**Published:** July 23, 2020

**Copyright:** © 2020 The PLOS ONE Staff. This is an open access article distributed under the terms of the [Creative Commons Attribution License](https://creativecommons.org/licenses/by/4.0/), which permits unrestricted use, distribution, and reproduction in any medium, provided the original author and source are credited.
